# Supplementary material for: The effect of mixing and free-floating carrier media on bioaerosol release from wastewater: a multiscale investigation with Bacillus globigii
Source: Royal Society of Chemistry journal article supplement (doi:10.1039/d1ew00151e), 2021-01-01
Supplement: d1ew00151e1.pdf [file d1ew00151e1.pdf]

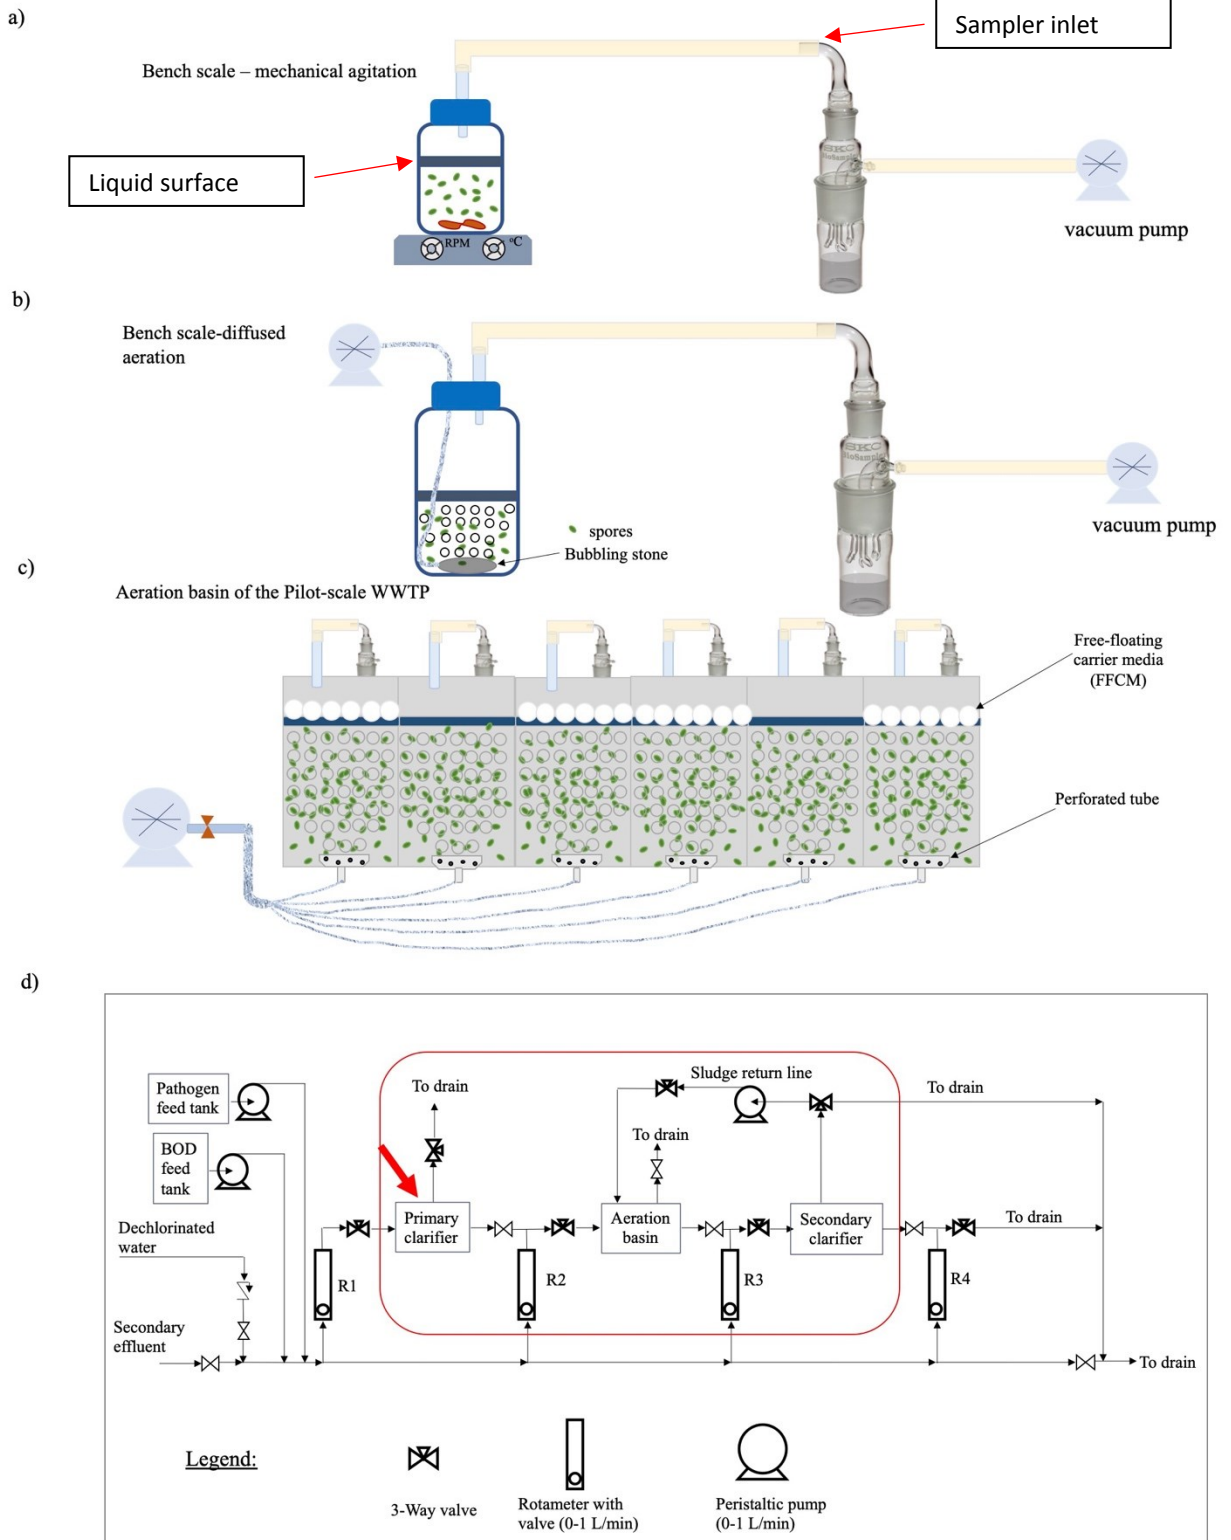

Figure S1. Schematic aeration and bioaerosol capture systems: a) Bench scale, 250 mL vessel, mechanical agitation; b) bench scale, diffused aeration with 1 L vessel, c) pilot scale, diffused aeration; d) the pilot-scale WWTP diagram; Only the primary clarifier, the aeration basin, and the secondary clarifier were used in this study.

Supplementary Tables

Table S1: Synthetic wastewater composition

| Compound                      | Formula                   | Concentration (mg/L) |
|-------------------------------|---------------------------|----------------------|
| <b>Organic Constituents</b>   |                           |                      |
| Casein                        | N/A                       | 47                   |
| Tryptone                      | N/A                       | 47                   |
| Starch                        | N/A                       | 84.4                 |
| Sodium Acetate                | $C_2H_3O_2Na \cdot 3H_2O$ | 31.9                 |
| Glycerol*                     | $C_3H_8O_3$               | 12                   |
| Caproic Acid*                 | $C_6H_{12}O_2$            | 11.6                 |
| <b>Inorganic Constituents</b> |                           |                      |
| Ammonium Sulfate              | $(NH_4)_2SO_4$            | 116.0                |
| Magnesium Sulfate             | $MgSO_4 \cdot 7H_2O$      | 69.6                 |
| Calcium Chloride              | $CaCl_2 \cdot 2H_2O$      | 22.5                 |
| Potassium Phosphate           | $K_2HPO_4$                | 27.6                 |
| Ferric Chloride               | $FeCl_3$                  | 11.0                 |
| Cupric Sulfate                | $CuSO_4 \cdot 5H_2O$      | 0.09                 |
| Sodium Molybdate              | $Na_2MoO_4 \cdot 2H_2O$   | 0.15                 |
| Manganese Sulfate             | $MnSO_4 \cdot H_2O$       | 0.13                 |
| Zinc Chloride                 | $ZnCl_2$                  | 0.23                 |
| Cobalt Chloride               | $CoCl_2 \cdot 6H_2O$      | 0.42                 |

Table S2. P values

| <b>Mechanical Agitation Experiments</b>                |                                                  |                                                  |                                             |                                             |                                               |                                              |                                              |                                              |
|--------------------------------------------------------|--------------------------------------------------|--------------------------------------------------|---------------------------------------------|---------------------------------------------|-----------------------------------------------|----------------------------------------------|----------------------------------------------|----------------------------------------------|
| <b>Rotating speed</b>                                  | 0.001 (1200 rpm vs 1100 rpm)                     | 7.75E-05 (1200 rpm vs. 1000 rpm)                 | 6.22E-05 (1200 rpm vs. 900 rpm)             | 0.00047 (1100 rpm vs 900 rpm)               | 0.02 (1000 rpm vs. 900 rpm)                   | 0.001 (1100 rpm vs. 1000 rpm)                |                                              |                                              |
| <b>Aeration Experiments, small vessel, bench scale</b> |                                                  |                                                  |                                             |                                             |                                               |                                              |                                              |                                              |
| <b>FFCM effects</b>                                    | 0.000616 (no FFCM vs. 0.5 g FFCM; low flow rate) | 0.000626 (no FFCM vs. 0.3 g FFCM; low flow rate) | 0.979 (0.5 g FFCM vs. 0.3 g FFCM; low flow) | 0.0176 (no FFCM vs. 0.5 g FFCM; high flow)  | 0.020 (no FFCM vs. 0.3 g FFCM; high flow)     | 0.113 (0.5g FFCM vs. 0.3 g FFCM; high flow)  |                                              |                                              |
| <b>Flow rate effects (no FFCM)</b>                     | 0.0407 (0.458 L/min vs. 0.854 L/min)             |                                                  |                                             |                                             |                                               |                                              |                                              |                                              |
| <b>Aeration Experiments, large vessel, bench scale</b> |                                                  |                                                  |                                             |                                             |                                               |                                              |                                              |                                              |
| <b>FFCM effects</b>                                    | 0.0047 (no FFCM vs. small beads @ 0.5 L/min)     | 0.0065 (no FFCM vs. large beads @0.5 L/min)      | 0.008 (no FFCM vs. small beads @0.65 L/min) | 0.006 (no FFCM vs. large beads @0.65 L/min) | 0.0095 (no FFCM vs. small beads @ 0.85 L/min) | 0.007 (no FFCM vs. large beads @ 0.85 L/min) | 0.0099 (no FFCM vs. small beads @ 1.0 L/min) | 0.0096 (non FFCM vs. large beads @1.0 L/min) |
| <b>Flow rate effects (no FFCM)</b>                     | 0.65 (0.5 L/min vs. 0.65 L/min)                  | 0.0017 (0.5 L/min vs. 0.85 L/min)                | 0.0018 (0.5 L/min vs. 1.0 L/min)            | 0.042 (0.65 L/min vs. 0.85 L/min)           | 0.025 (0.65 L/min vs. 1.0 L/min)              | 0.04 (0.85 L/min vs. 1.0 L/min)              |                                              |                                              |
